# Supplementary figures and images for: Optimization of enzymatic production of anti-diabetic peptides from black bean (Phaseolus vulgaris L.) proteins, their characterization and biological potential
Source: Royal Society of Chemistry journal article supplement (doi:10.1039/c5fo01204j), 2016-01-01

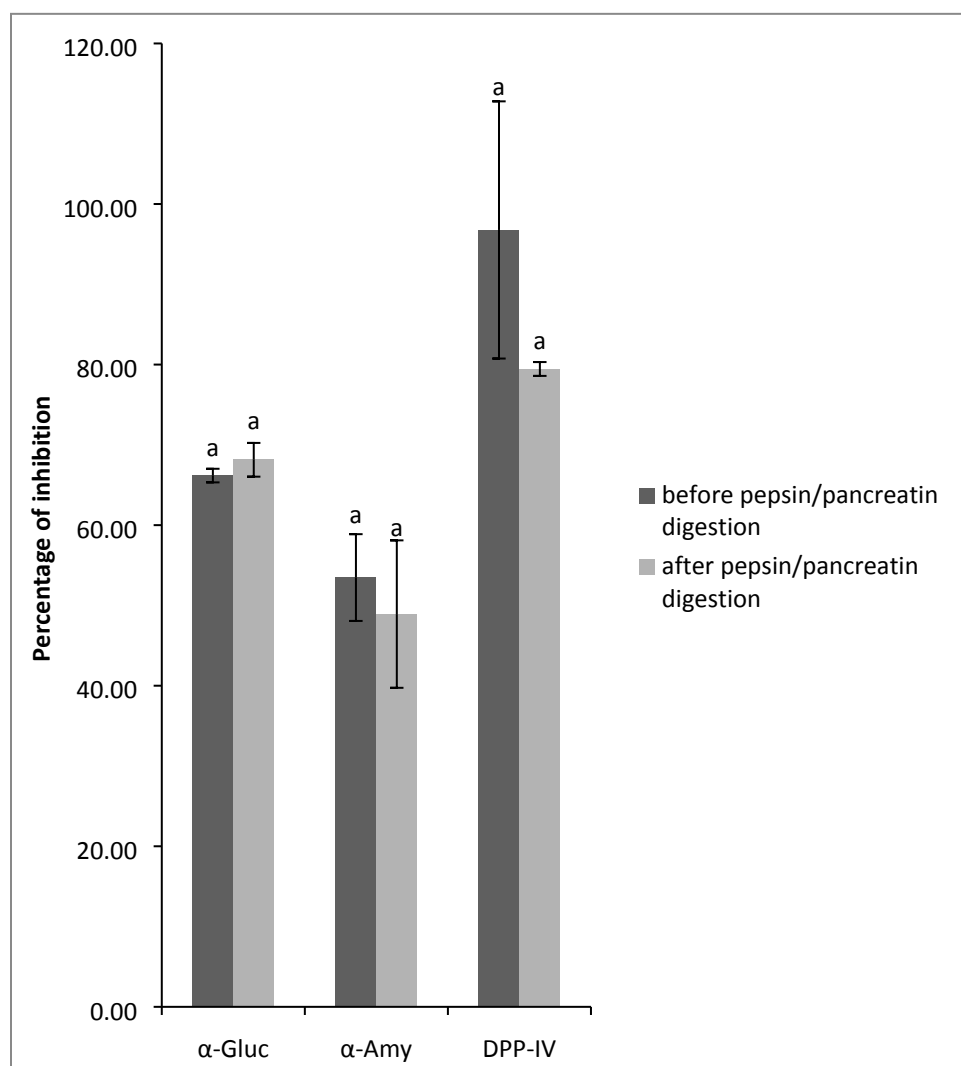

Supplemental Fig. 1

Supplement: c5fo01204j1.pdf [file c5fo01204j1.pdf]
